# Supplementary material for: Clinical significance and biological functions of chemokine CXCL3 in head and neck squamous cell carcinoma
Source: PubMed Central journal article supplement (PMC8696619; doi:10.1042/bsr20212403), 2021-12-22
Supplement: BSR-2021-2403_supp.pdf [file BSR-2021-2403_supp.pdf]

A

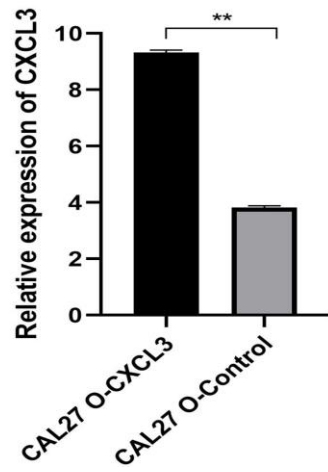

B

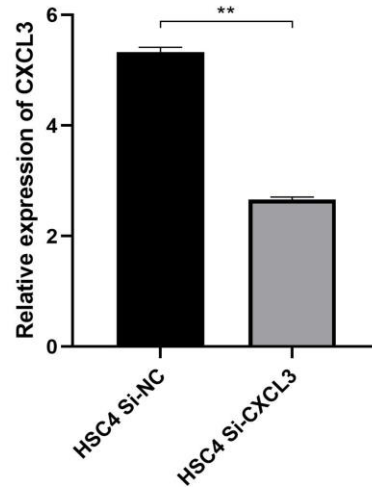

**Figure S1 CXCL3 mRNA expression levels in HNSCC cell were detected by qRT-PCR. (A) Relative mRNA expression of CXCL3 in CAL27 cells. (B) Relative mRNA expression of CXCL3 in HSC4 cells.**

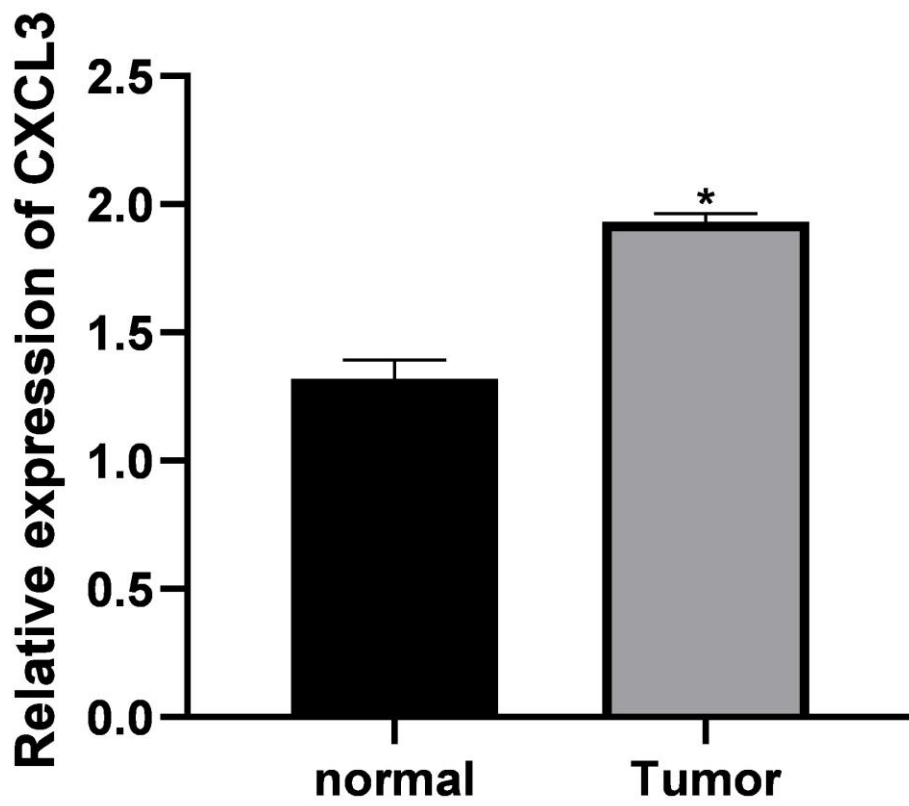

Figure S2 The expression level of CXCL3 in serum samples from the GEO database.
